# Supplementary material
Source: PubMed Central journal article supplement (PMC3143643)
Supplement: supp_M111.254086_jbc.M111.254086-1.pdf [file supp_M111.254086_jbc.M111.254086-1.pdf]

Novel ganglioside-mediated entry of botulinum neurotoxin serotype D into neurons"  
(JBC/2011/254086)  
Kroken et al.

Supplemental Figure 1

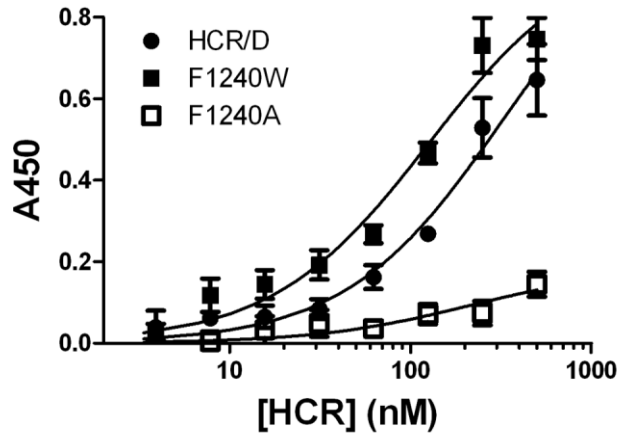

Fig S1. Ganglioside binding mediated by F1240 is conserved with W substitution. GT1b (0.5ug/well) was immobilized on 96-well microtiter plate. HCR/D, F1240W, and F1240A were bound for 1 hr at 4°C. Bound HCR was detected using anti-FLAG antibody and HRP- conjugated secondary mAb and detection by using Ultra-TMB. The reaction was stopped with sulfuric acid and absorbance was read at 450 nm. Data were generated in triplicate and shown as described in the Experimental Procedures.

Supplemental Figure 2  
Kroken et al.

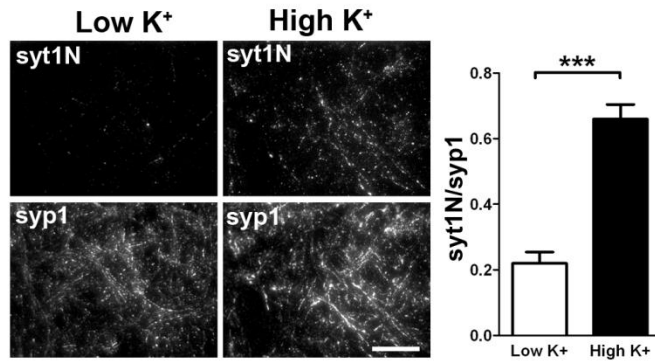

**Fig S2.** High potassium triggers exocytosis of synaptic vesicles. An N-terminal monoclonal synaptotagmin antibody labeled with Oyster 650 (syt1N) was incubated with rat E18 primary cortical neurons for 5 min at 37°C in 56 mM K<sup>+</sup> (high) or 5.6mM K<sup>+</sup> (low) buffer. Cells were fixed, permeabilized, and stained for synaptophysin1. Representative immunofluorescence images are shown. Scale bar = 20µm. Quantification of syt1N was normalized to syp1 signal and averaged from five fields; \*\*\*, P<0.001.

Supplemental Figure 3  
Kroken et al.

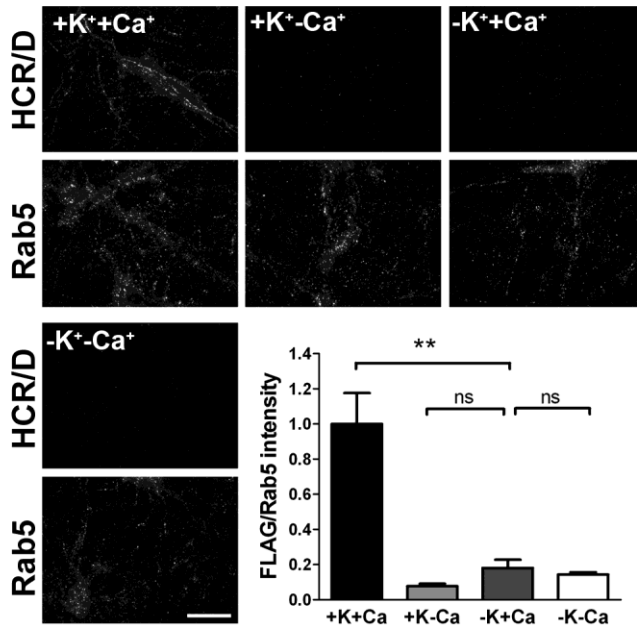

**Fig S3.** Uncoupling membrane depolarizing with SV cycling inhibits HCR/D entry. HCR/D was incubated with rat E18 primary cortical neurons for 5 min at 37°C in +K<sup>+</sup>,+Ca<sup>++</sup>, +K<sup>+</sup>,-Ca<sup>++</sup>, -K<sup>+</sup>,+Ca<sup>++</sup>, or -K<sup>+</sup>,-Ca<sup>++</sup> buffer. Cells were fixed, permeabilized, and stained for FLAG-HCR and Rab5. Representative immunofluorescence images are shown. Scale bar = 20µm. Quantification of FLAG-HCR was normalized to Rab5 signal and averaged from five fields; \*\*, P<0.01 and ns, not significant.
